# Supplementary material for: Comparing conventional and microwave-assisted heating in PET degradation mediated by imidazolium-based halometallate complexes
Source: Royal Society of Chemistry journal article supplement (doi:10.1039/c8nj06090h), 2019-01-01
Supplement: c8nj06090h1.pdf [file c8nj06090h1.pdf]

## ELECTRONIC SUPPLEMENTARY INFORMATION

### Comparing Conventional and Microwave-Assisted Heating in PET Degradation Mediated by Imidazolium-Based Halometallate Complexes†

Fabio Scé,<sup>a</sup> Israel Cano,<sup>\*b</sup> Carmen Martín,<sup>b</sup> Garikoitz Beobide,<sup>c</sup> Óscar Castillo<sup>c</sup> and Imanol de Pedro<sup>\*a</sup>

<sup>a</sup>Universidad de Cantabria, CITIMAC, Facultad de Ciencias, Avda. de los Castros s/n, 39005 Santander, Spain.

<sup>b</sup>GSK Carbon Neutral Laboratory for Sustainable Chemistry, University of Nottingham, NG7 2GA, Nottingham, UK

<sup>c</sup>Universidad del País Vasco, Departamento de Química Inorgánica, Facultad de Ciencia y Tecnología, Apartado 644, E-48080, Bilbao, Spain.

#### Contents

|                                                                                                 |    |
|-------------------------------------------------------------------------------------------------|----|
| 1. X-ray crystal structure of (dimim) <sub>2</sub> [Fe <sub>2</sub> Cl <sub>6</sub> (μ-O)]..... | S2 |
| 2. Recycling experiments.....                                                                   | S3 |
| 3. Characterization of BHET product.....                                                        | S4 |
| 4. X-ray crystal structure of BHET product.....                                                 | S5 |

## 1. X-ray crystal structure of (dimim)<sub>2</sub>[Fe<sub>2</sub>Cl<sub>6</sub>(μ-O)]

**Table S1** Crystallographic data and structure refinement details of (dimim)<sub>2</sub>[Fe<sub>2</sub>Cl<sub>6</sub>(μ-O)].

| <b>(dimim)<sub>2</sub>[Fe<sub>2</sub>Cl<sub>6</sub>(μ-O)]</b>                            |                                                                                  |
|------------------------------------------------------------------------------------------|----------------------------------------------------------------------------------|
| Empirical formula                                                                        | C <sub>10</sub> H <sub>18</sub> Cl <sub>6</sub> Fe <sub>2</sub> N <sub>4</sub> O |
| Formula weight                                                                           | 550.47                                                                           |
| Crystal system                                                                           | triclinic                                                                        |
| Space group                                                                              | <i>P</i> $\bar{1}$                                                               |
| <i>a</i> (Å)                                                                             | 7.322(1)                                                                         |
| <i>b</i> (Å)                                                                             | 7.5071(8)                                                                        |
| <i>c</i> (Å)                                                                             | 10.492(1)                                                                        |
| $\alpha$ (°)                                                                             | 103.00(1)                                                                        |
| $\beta$ (°)                                                                              | 100.47(1)                                                                        |
| $\gamma$ (°)                                                                             | 92.43(1)                                                                         |
| <i>V</i> (Å <sup>3</sup> )                                                               | 550.5(1)                                                                         |
| <i>Z</i>                                                                                 | 1                                                                                |
| $\rho$ (g·cm <sup>-3</sup> )                                                             | 1.613                                                                            |
| $\mu$ (mm <sup>-1</sup> )                                                                | 17.321                                                                           |
| Reflections collected                                                                    | 3365                                                                             |
| Unique data/parameters                                                                   | 2130/109                                                                         |
| <i>R</i>                                                                                 | 0.0430                                                                           |
| Goodness of fit ( <i>S</i> ) <sup>a</sup>                                                | 1.088                                                                            |
| <i>R</i> <sub>1</sub> <sup>b</sup> / <i>wR</i> <sup>2c</sup> [ <i>I</i> >2σ( <i>I</i> )] | 0.0865/0.2671                                                                    |
| <i>R</i> <sub>1</sub> <sup>b</sup> / <i>wR</i> <sup>2c</sup> [all data]                  | 0.0970/0.2806                                                                    |

<sup>a</sup>  $S = [\sum w(F_o^2 - F_c^2)^2 / (N_{obs} - N_{param})]^{1/2}$ . <sup>b</sup>  $R_1 = \sum ||F_o| - |F_c|| / \sum |F_o|$ ; <sup>c</sup>  $wR2 = [\sum w(F_o^2)^2 - F_c^2)^2 / \sum w(F_o^2)^2]^{1/2}$ ;  $w = 1/[\sigma^2(F_o^2) + (aP)^2 + bP]$  where  $P = (\max(F_o^2, 0) + 2F_c^2)/3$ , being  $a = 0.1687$ ,  $b = 0.3119$ .

**Table S2** Selected bond lengths and angles of [Fe<sub>2</sub>Cl<sub>6</sub>(μ-O)]<sup>2-</sup> anion.

| <b>Bond lengths (Å)</b> |          |
|-------------------------|----------|
| Fe1–O1                  | 1.848(2) |
| Fe1–Cl1                 | 2.217(2) |
| Fe1–Cl2                 | 2.211(2) |
| Fe1–Cl3                 | 2.206(4) |
| <b>Angles (°)</b>       |          |
| O1–Fe1–Cl1              | 103.1(6) |
| O1–Fe1–Cl2              | 104.3(7) |
| O1–Fe1–Cl3              | 124.5(5) |
| Cl1–Fe1–Cl2             | 106.1(1) |
| Cl1–Fe1–Cl3             | 110.3(1) |
| Cl2–Fe1–Cl3             | 107.2(2) |

## 2. Recycling Experiments

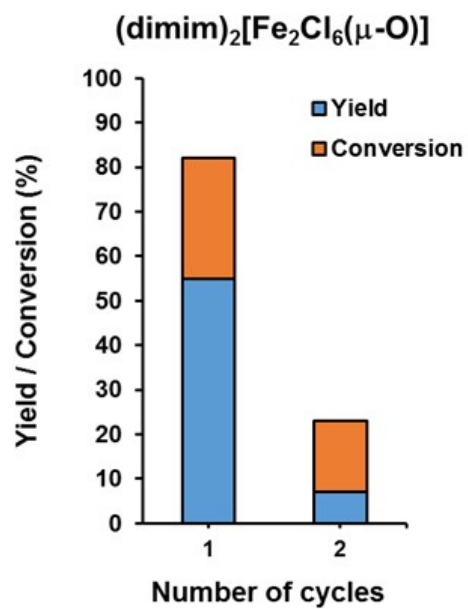

**Fig. S1** Reuse of  $(\text{dimim})_2[\text{Fe}_2\text{Cl}_6(\mu\text{-O})]$  in the glycolysis of PET. Reagents and conditions: **2** (0.0425 mmol), PET (125 mg), EG (0.8 mL), 170 °C, 24 h.

### 3. Characterization of BHET product

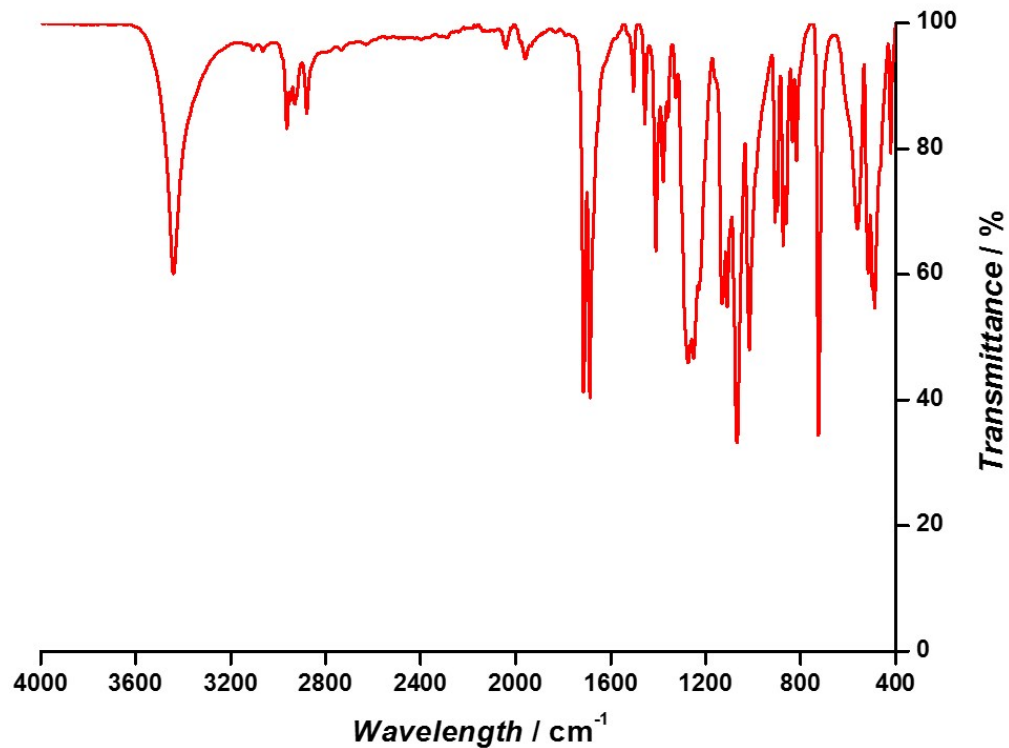

Fig. S2 IR spectrum of BHET product.

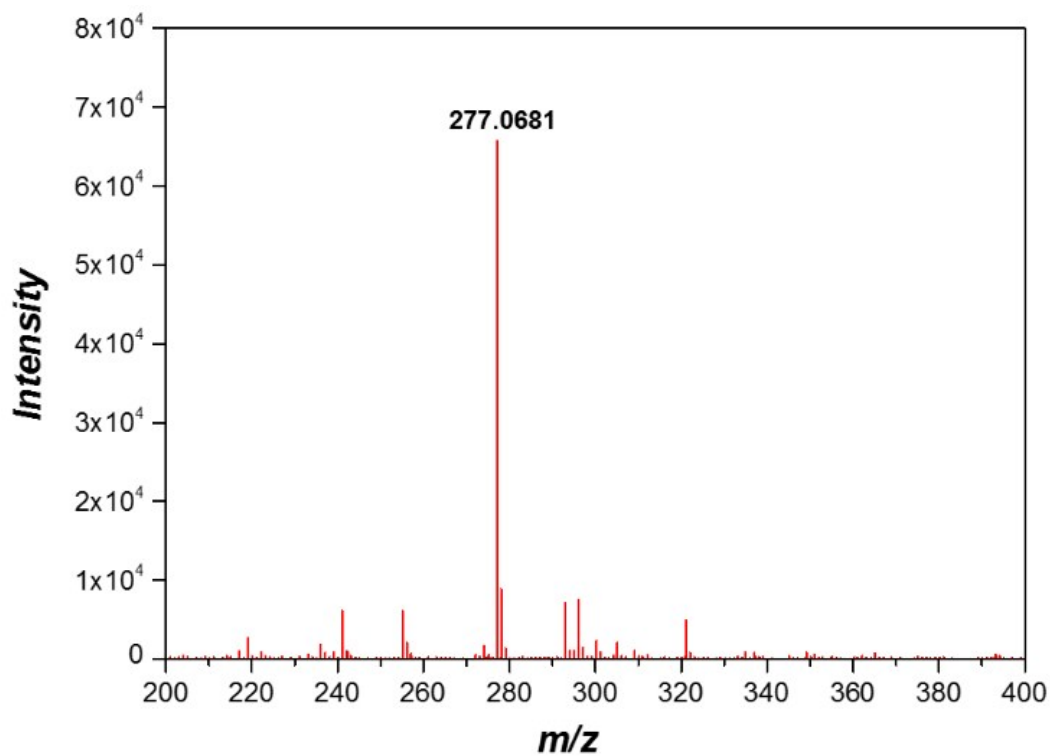

Fig. S3 ESI-MS spectrum of BHET product.

#### 4. X-ray crystal structure of BHET

**Table S3** Crystallographic data and structure refinement details of BHET.

|                                                                              | <b>BHET</b>                                    |
|------------------------------------------------------------------------------|------------------------------------------------|
| Empirical formula                                                            | C <sub>12</sub> H <sub>14</sub> O <sub>6</sub> |
| Formula weight                                                               | 254.23                                         |
| Crystal system                                                               | triclinic                                      |
| Space group                                                                  | <i>P</i> $\bar{1}$                             |
| <i>a</i> (Å)                                                                 | 8.2252(3)                                      |
| <i>b</i> (Å)                                                                 | 9.3639(9)                                      |
| <i>c</i> (Å)                                                                 | 16.501(1)                                      |
| $\alpha$ (°)                                                                 | 87.306(7)                                      |
| $\beta$ (°)                                                                  | 84.160(5)                                      |
| $\gamma$ (°)                                                                 | 80.338(6)                                      |
| <i>V</i> (Å <sup>3</sup> )                                                   | 1245.8(2)                                      |
| <i>Z</i>                                                                     | 4                                              |
| $\rho$ (g·cm <sup>-3</sup> )                                                 | 1.355                                          |
| $\mu$ (mm <sup>-1</sup> )                                                    | 1.844                                          |
| Reflections collected                                                        | 14759                                          |
| Unique data/parameters                                                       | 8599/330                                       |
| R                                                                            | 0.0435                                         |
| Goodness of fit (S) <sup>a</sup>                                             | 0.948                                          |
| R <sub>1</sub> <sup>b</sup> /wR <sub>2</sub> <sup>c</sup> [I>2 $\sigma$ (I)] | 0.0764/ 0.1975                                 |
| R <sub>1</sub> <sup>b</sup> /wR <sub>2</sub> <sup>c</sup> [all data]         | 0.0968/ 0.2097                                 |

<sup>a</sup>  $S = [\sum w(F_0^2 - F_c^2)^2 / (N_{\text{obs}} - N_{\text{param}})]^{1/2}$ . <sup>b</sup>  $R_1 = \sum ||F_0| - |F_c|| / \sum |F_0|$ ; <sup>c</sup>  $wR_2 = [\sum w(F_0^2)^2 - F_c^2)^2 / \sum w(F_0^2)^2]^{1/2}$ ;  $w = 1/[\sigma^2(F_0^2) + (aP)^2 + bP]$  where  $P = (\max(F_0^2, 0) + 2Fc^2)/3$ , being  $a = 0.1502$ ,  $b = 0$ .

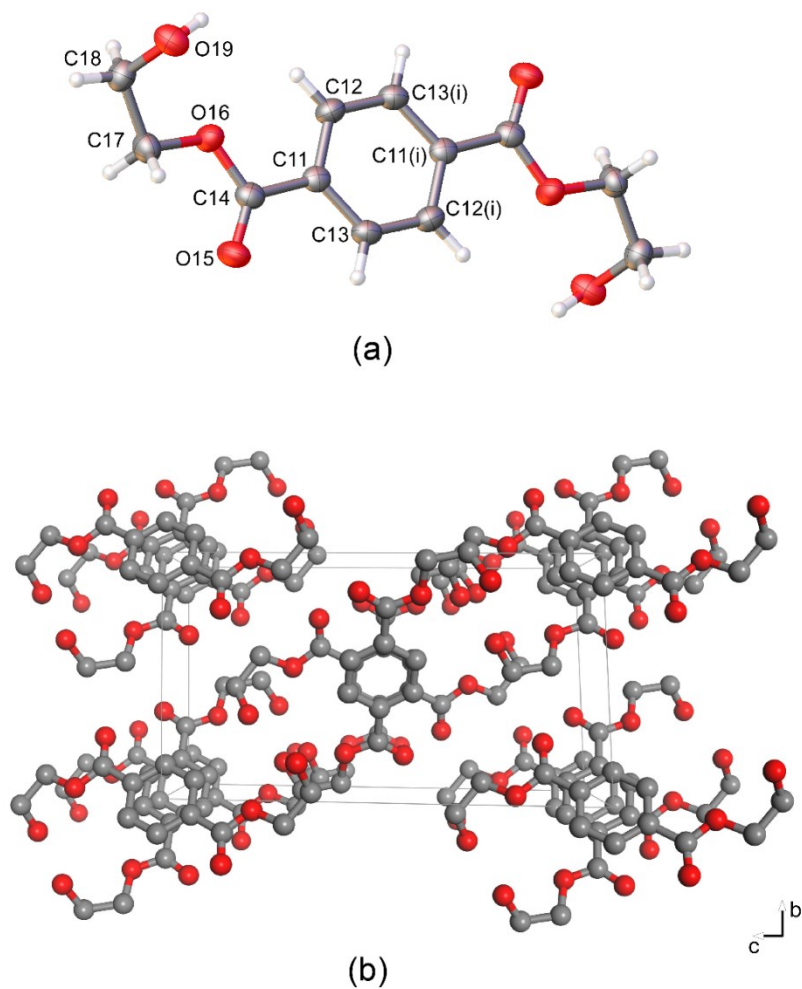

**Fig. S4** Crystal structure of the new BHET ( $P\bar{1}$ ) polymorph. (a) One of the four crystallographically independent BHET molecules showing the numbering scheme (i:  $-x$ ,  $1-y$ ,  $1-z$ ). Thermal ellipsoids are drawn at 50% probability. (b) Perspective view of the crystal structure along the  $[100]$  direction. Hydrogen atoms were omitted for the sake of clarity.
